# Supplementary material
Source: PubMed Central journal article supplement (PMC7008364)
Supplement: supp_RA119.011857_157057_1_supp_448886_q2xbd7.pdf [file supp_RA119.011857_157057_1_supp_448886_q2xbd7.pdf]

Delineating the distinct roles of TAK1 and IRAK-1/4 through the discovery of a super-selective IRAK-1/4 inhibitor

**Scott Scarneo<sup>1</sup>, Philip Hughes<sup>1</sup>, Kelly W. Yang<sup>1</sup>, David Carlson<sup>1</sup>, Deepak Gurbani<sup>2</sup>,  
Kenneth D. Westover<sup>3</sup>, Timothy Haystead<sup>1</sup>**

<sup>1</sup>Department of Pharmacology and Cancer Biology, Duke University School of Medicine, Durham, NC 27710

<sup>2</sup>Departments of Biochemistry and Radiation Oncology, University of Texas, Southwestern Medical Center, 5323 Harry Hines Boulevard, Dallas, TX 75390, USA

<sup>3</sup>Departments of Biochemistry and Radiation Oncology, University of Texas, Southwestern Medical Center, 5323 Harry Hines Boulevard, Dallas, TX 75390, USA

Address correspondence to Timothy Haystead, Ph.D.: Department of Pharmacology and Cancer Biology, Duke University Medical School. LSRC C112, 308 Research Drive, Durham, NC 27710

Phone Number: (919) 613-8609. Fax Number: (919) 613-8600

Email: Timothy.Haystead@Duke.edu

Synthesis of HS243 and other analogs.

Reagents were obtained from commercial sources and used without further purification. Proton NMR spectra were obtained on Varian 400 and 500 MHz spectrometers. LC/MS were obtained on an Agilent ion-trap LC/MS system.

Legend:

**HS-231** mixture of **3a** and **3b**

**HS-232** **9**

**HS-233** **5b**

**HS-234** **5a**

**HS-238** **10a**

**HS-242** **11a**

**HS-243** **12**

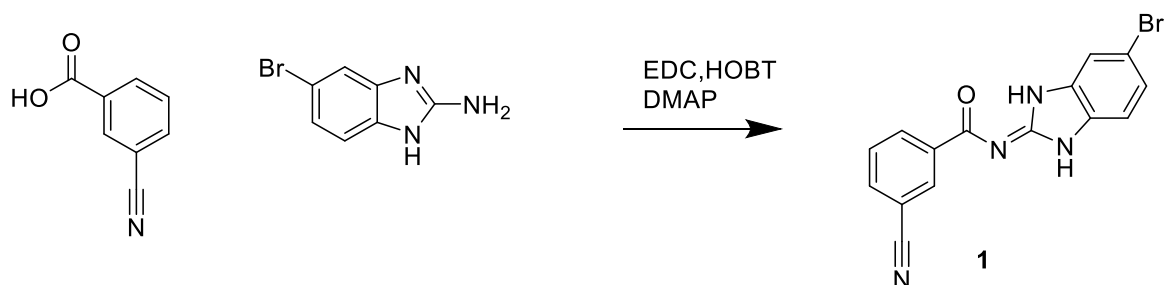

3-Cyanobenzoic acid (600 mg, 4.08 mmol) and 5-bromo-1H-benzimidazol-2-amine (865 mg, 4.08 mmol) were mixed with EDC (1.56 g, 8.16 mmol), HOBT (551 mg, 4.08 mmol) and DMAP (10 mg, 82  $\mu$ mol), slurried in DMF (5 mL) and treated with Hunig' base (527 mg, 4.08 mmol). The mixture was stirred for 16 h and then concentrated. The solid residue was slurried in hot ethanol, cooled and a white powder was filtered off, washed with ethanol and air-dried to give nitrile **1** (980 mg, 70 %) as an off-white solid. LC/MS gave a single peak with  $m/z = 341.0$  and  $343.0$ ,  $[M+H]^+$ .

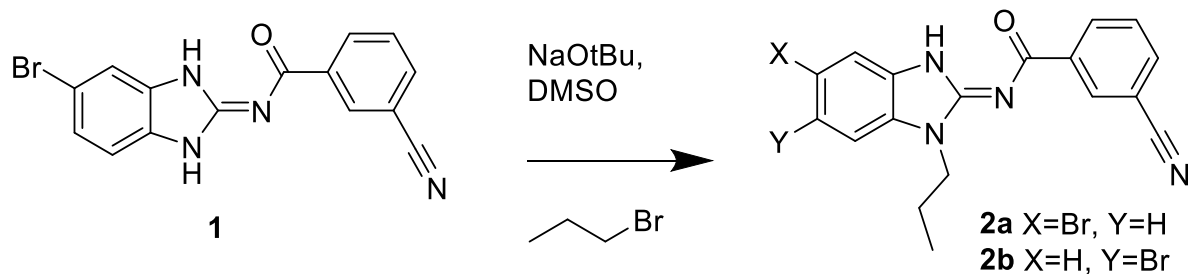

Nitrile **1** (980 mg, 2.97 mmol) was dissolved in THF (18 mL) and DMSO (7.5 mL) and treated with potassium t-butoxide (5.7 mL of 1M THF solution) followed by 1-bromopropane (333  $\mu$ L, 706 mg, 5.7 mmol) and stirred at RT. After 2 h, the mixture was treated with a little acetic acid (200  $\mu$ L) and stirred for an hour. The mixture was then poured into water (100 mL) giving rise to substantial precipitation. The slurry was stirred vigorously overnight then filtered and air-dried to give a mixture of **2a** and **2b** (838 mg, 76%) as a fluffy white powder. Some of the mixture (400 mg) was adsorbed onto silica and chromatographed (80 g Isco silica gel, 0 to 20% EtOAc in  $\text{CH}_2\text{Cl}_2$ ) to give a partial separation of the two compounds. The clean fractions of the earlier eluting compound were combined to give **2a** (called upper bromide, 184 mg). LC/MS shows a single tailing peak with  $m/z = 383.1$  and  $385.1$ ,  $[\text{M}+\text{H}]^+$ .  $^1\text{H-NMR}$  (dms $o$ - $d_6$ )  $\delta$  8.52 (s, 1H), 8.51 (d,  $J = 8$  Hz, 1H), 8.00 (d,  $J = 8$  Hz, 1H), 7.71, (t,  $J = 8$  Hz, 1H), 7.70 (s, 1H), 7.55 (d,  $J = 8$  Hz, 1H), 7.43 (d,  $J = 8$  Hz, 1H), 4.25 (t,  $J = 7$  Hz, 2H), 1.83 (p,  $J = 7$  Hz, 2H), 0.91 (t,  $J = 7$  Hz, 3H). The clean fractions of the later eluting compound were combined to give **2b** (called lower bromide, 145 mg). LC/MS shows a single tailing peak with  $m/z = 383.1$  and  $385.1$ ,  $^1\text{H-NMR}$  (dms $o$ - $d_6$ )  $\delta$  8.52 (s, 1H), 8.51 (d,  $J = 8$  Hz, 1H), 7.99 (d,  $J = 8$  Hz, 1H), 7.87 (s, 1H), 7.71, (t,  $J = 8$  Hz, 1H), 7.47 (d,  $J = 8$  Hz, 1H), 7.40 (d,  $J = 8$  Hz, 1H), 4.25 (t,  $J = 7$  Hz, 2H), 1.83 (p,  $J = 7$  Hz, 2H), 0.93 (t,  $J = 7$  Hz, 3H).

We were unable to obtain adequate NOe spectra to assign the structures. Identification of the isomeric structures was assigned later based on an unambiguous region-controlled synthesis of **2a** (see below).

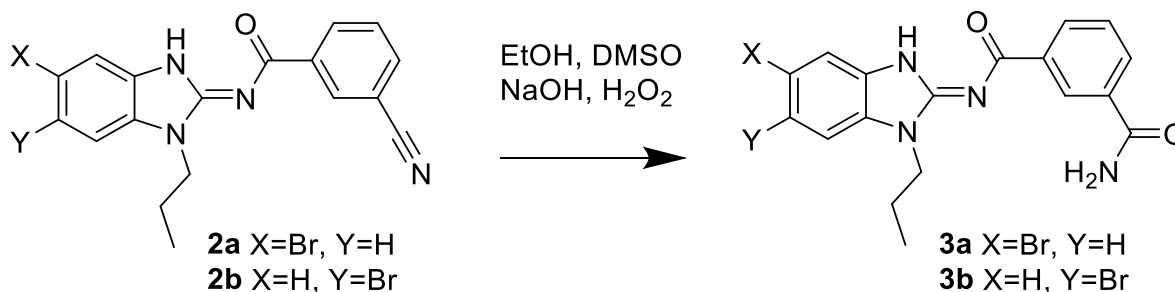

**HS-231.** A mixture of bromonitriles, **21a** and **21b** (22 mg, 57  $\mu$ mol) was dissolved in DMSO (350  $\mu$ L) and diluted with ethanol (500  $\mu$ L). This was then treated with 50% NaOH (2 drops) followed by 30% hydrogen peroxide (3 drops). TLC indicated a new product, so the reaction mixture was adsorbed onto silica gel and chromatographed (silica gel, 0 to 10% MeOH in  $\text{CH}_2\text{Cl}_2$ ) to give product in a single peak. The product was triturated in methanol to give the product, a mixture of bromide regioisomers, **3a** and **3b** (15.5 mg, 67%) as a white solid. LC/MS showed a single peak for the product ( $m/z = 401.1$ ,  $[\text{M}+\text{H}]^+$ ).

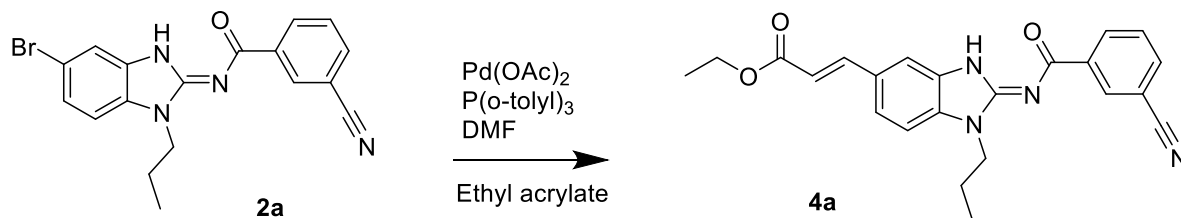

Nitrile **2a** (upper bromide, 100 mg, 261  $\mu\text{mol}$ ) was mixed with tri(o-tolyl)phosphine (9.5 mg, 31  $\mu\text{mol}$ ) and palladium(II) acetate (6 mg, 26  $\mu\text{mol}$ ) in DMF (1 mL) and treated with triethylamine (53 mg, 522  $\mu\text{mol}$ ) and ethyl acrylate (52 mg, 522  $\mu\text{mol}$ ), and stirred at RT with nitrogen bubbling. The mixture was then heated to 125  $^\circ\text{C}$  under nitrogen for 20 h and allowed to cool. The reaction mixture was diluted with DMSO (1 mL) and heated slightly to re-dissolve the product. The mixture was passed through a filter to remove palladium onto a column and chromatographed (43 g Isco C-18, 0 to 100% MeOH in 0.2%  $\text{HCO}_2\text{H}$ ) to give **4a** (86 mg, 82%) as a white solid. LC/MS gave a single peak with  $m/z = 403.2$   $[\text{M}+\text{H}]^+$ .  $^1\text{H-NMR}$  (dms $o$ - $d_6$ )  $\delta$  8.54 (s, 1H), 8.52 (d,  $J = 8$  Hz, 1H), 8.00 (d,  $J = 8$  Hz, 1H), 7.78 (s, 1H), 7.73 (d,  $J = 16$  Hz, 1H), 7.72 (t,  $J = 8$  Hz, 1H), 7.69 (d,  $J = 8$  Hz, 1H), 7.62 (d,  $J = 8$  Hz, 1H), 6.53 (d,  $J = 16$  Hz, 1H), 4.28 (t,  $J = 7$  Hz, 2H), 4.20 (q,  $J = 7$  Hz, 2H), 1.84 (hex,  $J = 7$  Hz, 2H), 1.27 (t,  $J = 7$  Hz, 3H), 0.93 (t,  $J = 7$  Hz, 3H).

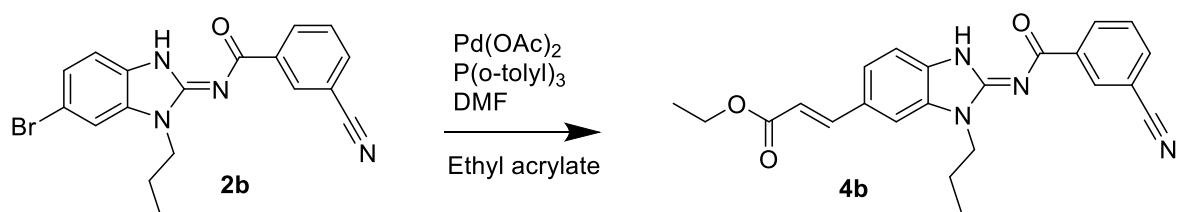

Nitrile **2b** (100 mg, 261  $\mu\text{mol}$ ) was reacted as described above for **2a** to give **4b** (103 mg, 98%) as a white solid. LC/MS gave a single peak with  $m/z = 403.3$   $[\text{M}+\text{H}]^+$ .  $^1\text{H-NMR}$  (dms $o$ - $d_6$ )  $\delta$  8.53 (s, 1H), 8.51 (d,  $J = 8$  Hz, 1H), 8.06 (s, 1H), 8.00 (d,  $J = 8$  Hz, 1H), 7.73 (d,  $J = 16$  Hz, 1H), 7.71 (t,  $J = 8$  Hz, 1H), 7.59 (d,  $J = 8$  Hz, 1H), 7.54 (d,  $J = 8$  Hz, 1H), 6.75 (d,  $J = 16$  Hz, 1H), 4.28 (t,  $J = 7$  Hz, 2H), 4.20 (q,  $J = 7$  Hz, 2H), 1.86 (hex,  $J = 7$  Hz, 2H), 1.27 (t,  $J = 7$  Hz, 3H), 0.95 (t,  $J = 7$  Hz, 3H).

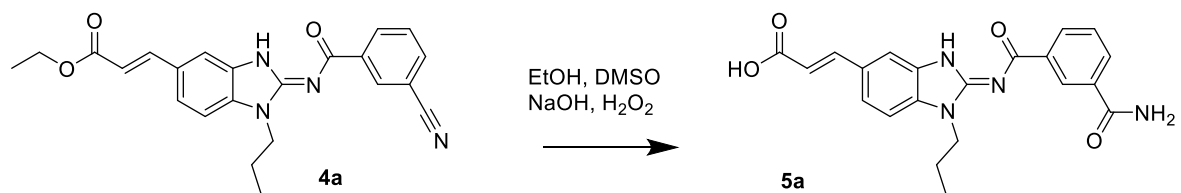

**HS-234.** Nitrile **4a** (150 mg, 373  $\mu\text{mol}$ ) was slurried in ethanol (4 mL) and treated with 50% NaOH (12 drops, about 25 mg NaOH/drop, 300 mg) followed by 30% hydrogen peroxide (5 drops). The mixture was stirred at RT for 3 d. The mixture was then acidified by slow addition of 1N HCl to pH = 1, which led to precipitation of the product. The solid was then filtered off and washed with water and air dried overnight to give **5a** (141 mg, 96%) as an off white solid. LC/MS gave a single peak with  $m/z = 393.2$   $[\text{M}+\text{H}]^+$ .  $^1\text{H-NMR}$  (dms $o$ - $d_6$ )  $\delta$  8.68 (s, 1H), 8.38 (d,  $J =$

8 Hz, 1H), 8.11 (br s, 1H), 8.00 (d, J = 8 Hz, 1H), 7.77 (s, 1H), 7.66 (d, J = 16 Hz, 1H), 7.57-7.63 (m, 2H), 7.55 (t, J = 8 Hz, 1H), 7.42 (br s, 1H), 6.43 (d, J = 16 Hz, 1H), 4.27 (t, J = 7 Hz, 2H), 1.85 (hx, J = 7 Hz, 2H), 0.93 (t, J = 7 Hz, 3H).

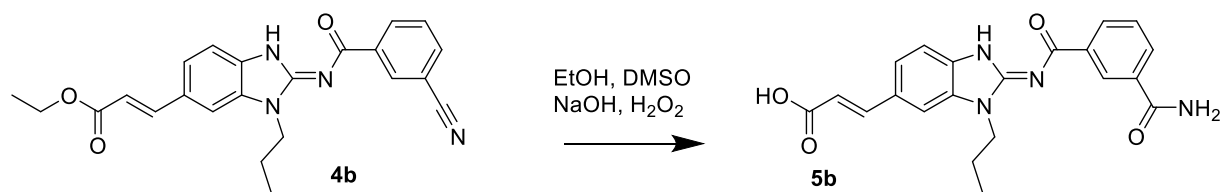

**HS-233.** Nitrile **4b** (50 mg, 124  $\mu$ mol) was reacted as described above for **4a** to give **5b** (103 mg, 98%) as a white solid. LC/MS gave a little peak which trailed out in the MS forever with  $m/z = 393.2$ ,  $[M+H]^+$ . NMR gave broad but consistent peaks in DMSO.  $^1\text{H-NMR}$  (dms $o$ -d $_6$ )  $\delta$  8.68 (br s, 1H), 8.37 (br d, 1H), 7.91 (br d, 1H), 7.74 (br s, 1H), 7.65 (br d, J = 16 Hz, 1H), 7.42-7.53 (m, 3H), 6.51 (br d, J = 16 Hz, 1H), 4.26 (br ?, 2H), 1.86 (m, 2H), 0.94 (br ?, 3H).

Independent synthesis of **2a**

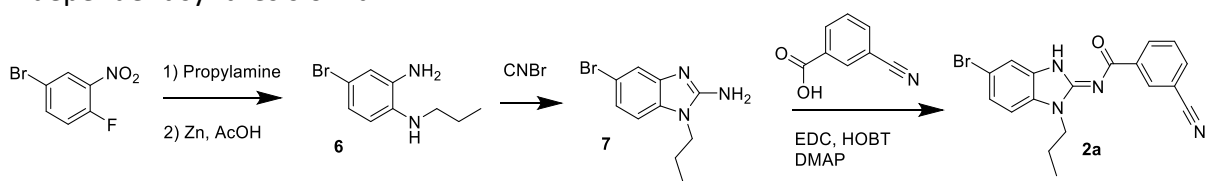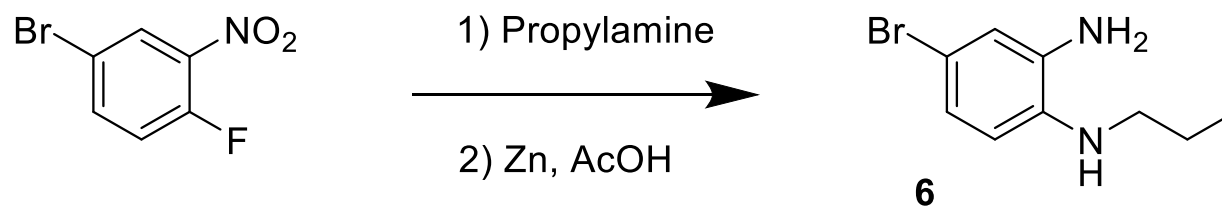

4-bromo-1-fluoro-2-nitrobenzene (1.5 g, 6.8 mmol) was dissolved in ethanol (10 mL) and treated with propyl amine (1.21 g, 1.68 mL, 20.4 mmol) and stirred at RT overnight. The next day, the reaction mixture was concentrated then re-dissolved in ethanol (20 mL) and acetic acid (5 mL). The mixture was treated with zinc powder (4 g) and heated to 80  $^{\circ}\text{C}$  with stirring for 1h. The reaction was allowed to cool and was filtered through Celite<sup>®</sup> with an ethanol wash. The eluant was concentrated then chromatographed (Silica gel, 100% CH<sub>2</sub>Cl<sub>2</sub>) to give the aniline **6** (1.49 g, 95%) as a clear oil, which solidified on standing. LC/MS gave a single peak with  $m/z = 229.0$  for  $[M+H]^+$ .  $^1\text{H-NMR}$  (dms $o$ -d $_6$ )  $\delta$  6.65 (d, J = 2.3 Hz, 1H), 6.57 (dd, J = 2.3, 8 Hz, 1H), 6.29 (d, J = 8 Hz, 1H), 4.83 (br s, 2H), 4.49 (br t, J = 5 Hz, 1H), 2.94 (br q, J = 6 Hz, 2H), 1.58 (hex, J = 7 Hz, 2H), 0.94 (t, J = 7 Hz, 3H).

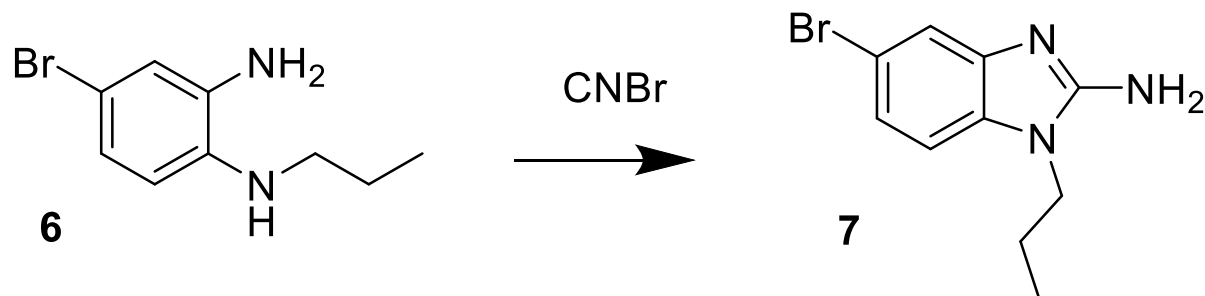

Analogous to *J. Med. Chem.* **2012**, *55*, 6523–6540. Bromoaniline **6** (440 mg, 1.93  $\mu\text{mol}$ ) was dissolved in ethanol (4 mL) and treated with fresh cyanogen bromide (306 mg, 2.89  $\mu\text{mol}$ ) and stirred at RT. After 1 h, the mixture was concentrated to give pink solid (728 mg). The pink solid was re-dissolved in ethanol, treated with xs 9/1 : MeOH/ $\text{NH}_4\text{OH}$  (2 mL) and concentrated onto silica gel (4 g) and chromatographed (40 g isco silica, 0 to 10% MeOH in  $\text{CH}_2\text{Cl}_2$ ) to give 2-aminobenzimidazole **7** (421 mg, 86%) as a white solid. LC/MS gave a single peak with  $m/z = 254.0$  for  $[\text{M}+\text{H}]^+$ .  $^1\text{H-NMR}$  ( $\text{dms}\text{-}d_6$ )  $\delta$  7.23 (br s, 1H), 7.1 (d,  $J = 8$  Hz, 1H), 6.29 (br d,  $J = 8$  Hz, 1H), 6.59 (br s, 2H), 3.91 (t,  $J = 7$  Hz, 2H), 1.62 (hex,  $J = 7$  Hz, 2H), 0.84 (t,  $J = 7$  Hz, 3H).

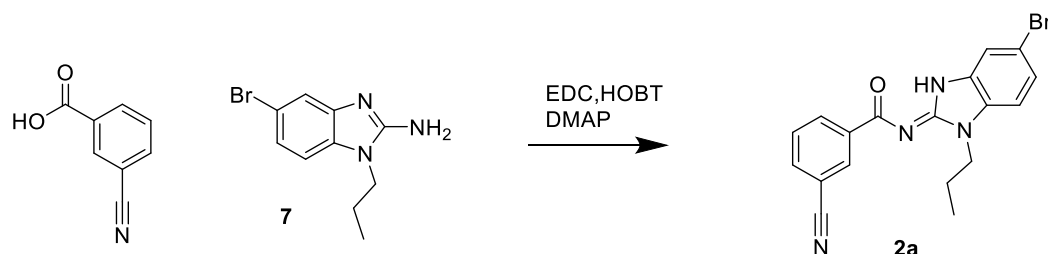

3-Cyanobenzoic acid (116 mg, 788  $\mu\text{mol}$ ) and 2-aminobenzimidazole **7** (200 mg, 788  $\mu\text{mol}$ ) were mixed with EDC (302 mg, 1.58 mmol), HOBT (106 mg, 788  $\mu\text{mol}$ ), DMAP (2 mg, 16  $\mu\text{mol}$ ) and slurried in DMF (2 mL) and treated with Hunig's base (102 mg, 788  $\mu\text{mol}$ ). The mixture was gently heated to dissolve everything and stirred at RT overnight. The next day, the reaction mixture was diluted with methanol (20 mL) and stirred as solids precipitated out. The solid was filtered off, washed with methanol, and air dried overnight to give nitrile **2a** (229 mg, 76%) as a white powder. Compound **2a**, prepared in this way, is identical to **2a** and different from **2b**, prepared by separation as described above.

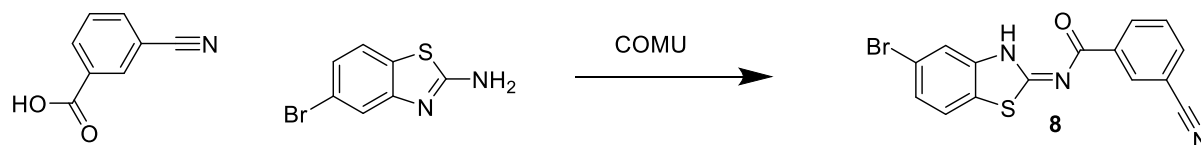

COMU (306 mg, 714  $\mu\text{mol}$ ) and 3-cyanobenzoic acid (100 mg., 680  $\mu\text{mol}$ ) were dissolved in DMF (1 mL) and treated with Hunig's base (88 mg, 680  $\mu\text{mol}$ ). After 5 m, 2-amino-5-bromobenzothiazole (156 mg, 680  $\mu\text{mol}$ ) was added along with more DMF (1 mL) and the mixture was stirred for 18 h. The mixture was treated with a little ethanol (2 mL) and heated to

clarity, then diluted with water (20 mL) which caused a lot of white solid to form. This was stirred vigorously for 2 hours then filtered and washed with water and air-dried to give nitrile **8** (243.9 mg, 100%) as a white solid. LC/MS gave a major peak with  $m/z = 357.9$  and  $359.9$  for  $[M+H]^+$ . There were 2 additional minor peaks in the UV trace. The material was used for the next step.

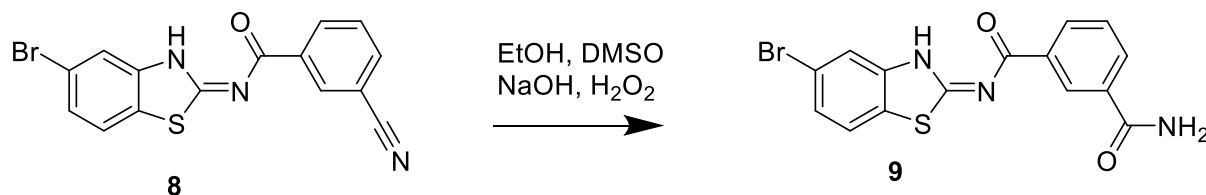

**HS-232.** Nitrile **8** (50 mg, 140  $\mu$ mol) was dissolved in DMSO (100  $\mu$ L) and diluted with ethanol (2 mL). This was then treated with 50% NaOH (5 drops). The mixture was stirred for 2 h, then treated with acetic acid (50  $\mu$ L), then ethanol (2 mL), then water (2 mL). The mixture was stirred overnight. The next day, the solids were filtered off and air-dried to give the amide product **9** (41 mg, 78%) as a white powder. LC/MS shows a small single peak and a trailing  $m/z = 376.0$  and  $378.0$  for  $[M+H]^+$ .

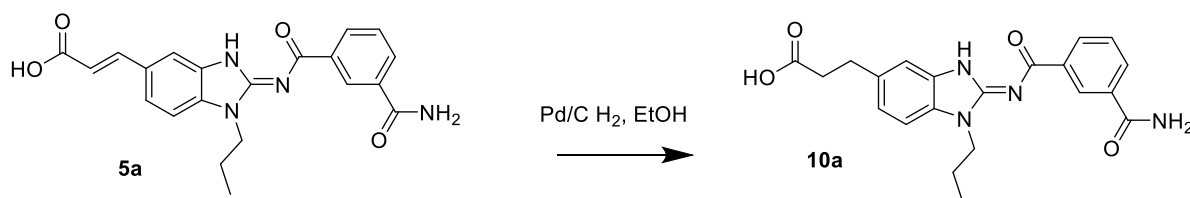

**HS-238.** Acid **5a** (40 mg, 102  $\mu$ mol) was slurried in ethanol (1 mL) and 10% Pd/C (5 mg) in EtOH (1 mL) and put under H<sub>2</sub> atmosphere with 3 vacuum flushes. After a week, LC/MS showed some progress. Acetic acid (1 mL) and more catalyst were added, and the reaction was mistakenly heated to reflux. LC/MS showed clean formation of product  $m/z = 395.1$  and no sign of starting material. The reaction mixture, which contained substantial precipitate, was stirred under nitrogen overnight, then diluted with DMSO (to dissolve product, 2 mL) and filtered through Celite<sup>®</sup>, concentrated and chromatographed (50 g isco C-18, 0.2% formic in water to 100% MeOH) to give product in approx. 4/1 : methanol/water. Crystals formed in the fractions and were filtered off to give the saturated acid **10a** (18.2 mg, 45%) as a white solid. LC/MS gave a single peak with  $m/z = 395.2$  for  $[M+H]^+$ . <sup>1</sup>H-NMR (dms<sub>o</sub>-d<sub>6</sub>)  $\delta$  8.67 (s, 1H), 8.37 (d,  $J = 8$  Hz, 1H), 8.09 (br s, 1H), 7.98 (d,  $J = 8$  Hz, 1H), 7.53 (t,  $J = 8$  Hz, 1H), 7.44 (d,  $J = 8$  Hz, 1H), 7.41 (br s, 1H), 7.40 (s, 1H), 7.14 (d,  $J = 8$  Hz, 1H), 4.24 (t,  $J = 7$  Hz, 2H), 2.90 (t,  $J = 7$  Hz, 2H), 2.55 (t,  $J = 7$  Hz, 1H), 1.83 (hx,  $J = 7$  Hz, 2H), 0.92 (t,  $J = 7$  Hz, 3H).

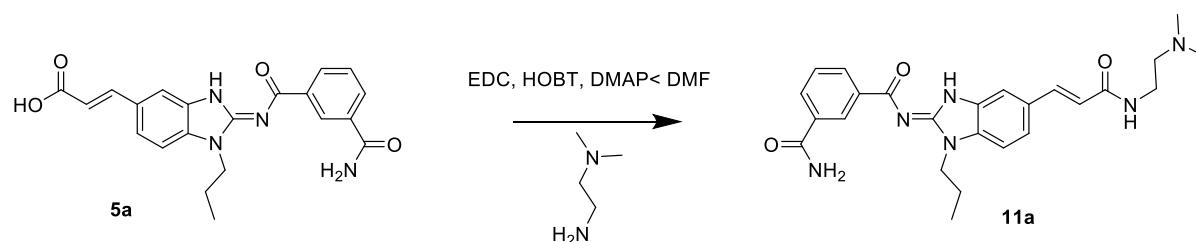

**HS-242.** Acid **5a** (100 mg, 0.25  $\mu$ mol) was mixed with HOBT (34 mg, 0.25  $\mu$ mol), DMAP (12 mg) and EDC (107 mg, 0.56  $\mu$ mol) then slurried in DMF (1 mL). Diamine (90 mg, 1 mmol) was added and the mixture sonicated to dissolve everything. After one day, the entire reaction mixture was added to a column and chromatographed (50 g isco C-18, 0.2% formic in water to 100% MeOH) to **11a** (41 mg, 35%) as an off-white solid. LC/MS gave a single peak with  $m/z = 463.2$  for  $[M+H]^+$ .  $^1\text{H-NMR}$  (dms $o$ - $d_6$ )  $\delta$  12.81 (br s, 1H), 8.68 (s, 1H), 8.38 (d,  $J = 8$  Hz, 1H), 8.20 (s, formate, 1H), 8.11-8.14 (m, 2H), 8.00 (d,  $J = 8$  Hz, 1H), 7.72 (s, 1H), 7.58 (d,  $J = 8$  Hz, 1H), 7.55 (t,  $J = 8$  Hz, 1H), 7.47 (d,  $J = 16$  Hz, 1H), 7.47 (d,  $J = 8$  Hz, 1H), 7.44 (br s, 1H), 6.62 (d,  $J = 16$  Hz, 1H), 4.27 (t,  $J = 7$  Hz, 2H), 3.30 (q,  $J = 7$  Hz, 2H), 2.39 (t,  $J = 7$  Hz, 2H), 2.20 (s, 6H), 1.85 (hx,  $J = 7$  Hz, 2H), 0.93 (t,  $J = 7$  Hz, 3H).

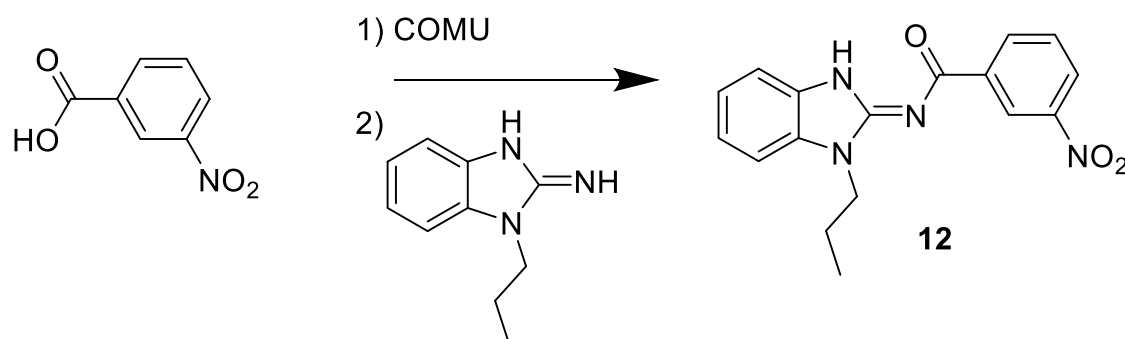

**HS-243.** COMU (270 mg, 629 mmol) and 3-nitrobenzoic acid (100 mg, 599 mmol) were combined in DMF (1 mL) and treated with Hunig's base (209 mL) followed by 1-propyl-2-aminobenzimidazole (105 mg, 599 mmol) in DMF (1 mL). After 1 h, the reaction mixture was added to a column and chromatographed (50 g isco C-18, 0.2% formic in water to 100% MeOH) to **12** (72 mg, 37%) as a light yellow fluffy solid. LC/MS gave a single peak with  $m/z = 325.1$  for  $[M+H]^+$ .  $^1\text{H-NMR}$  (dms $o$ - $d_6$ )  $\delta$  8.95 (s, 1H), 8.64 (d,  $J = 8$  Hz, 1H), 8.38 (d,  $J = 8$  Hz, 1H), 7.79 (t,  $J = 8$  Hz, 1H), 7.58 (d,  $J = 8$  Hz, 1H), 7.57 (d,  $J = 8$  Hz, 1H), 7.28 (t,  $J = 8$  Hz, 1H), 7.25 (t,  $J = 8$  Hz, 1H), 4.28 (t,  $J = 7$  Hz, 2H), 1.86 (hex,  $J = 7$  Hz, 2H), 0.95 (t,  $J = 7$  Hz, 3H).



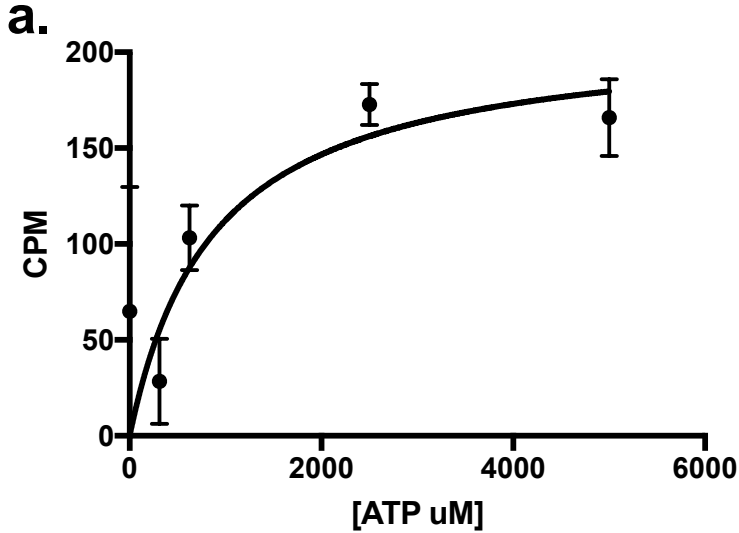

**Figure 1s**  
Km determination of IRAK-4 for ATP. Km ~0.5 mM.

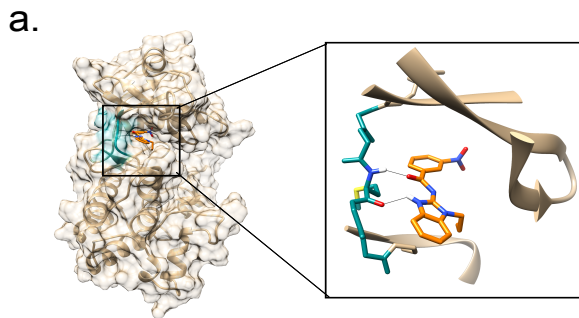

**Figure 2s.**  
Modeling of HS-243 in the ATP binding pocket of IRAK-4. (a) Modeling of HS-243 binding in IRAK-4 ATP binding pocket indicated critical hydrogen binding of nitrogen and oxygen of HS-243 to a methionine residue of IRAK-4.

*Delineation of IRAK and TAK1 inflammatory processes*

| Kinase                        | Abbreviation | % Activity Remaining | Log (Inhibition) |
|-------------------------------|--------------|----------------------|------------------|
| AAK1                          | AAK1         | 86                   | 1.934498451      |
| ABL1(E255K)-phosphorylated    | ABL1         | 100                  | 2                |
| ABL1(F317I)-nonphosphorylated | ABL1         | 100                  | 2                |
| ABL1(F317I)-phosphorylated    | ABL1         | 100                  | 2                |
| ABL1(F317L)-nonphosphorylated | ABL1         | 100                  | 2                |
| ABL1(F317L)-phosphorylated    | ABL1         | 100                  | 2                |
| ABL1(H396P)-nonphosphorylated | ABL1         | 89                   | 1.949390007      |
| ABL1(H396P)-phosphorylated    | ABL1         | 100                  | 2                |
| ABL1(M351T)-phosphorylated    | ABL1         | 100                  | 2                |
| ABL1(Q252H)-nonphosphorylated | ABL1         | 89                   | 1.949390007      |
| ABL1(Q252H)-phosphorylated    | ABL1         | 100                  | 2                |
| ABL1(T315I)-nonphosphorylated | ABL1         | 100                  | 2                |
| ABL1(T315I)-phosphorylated    | ABL1         | 100                  | 2                |
| ABL1(Y253F)-phosphorylated    | ABL1         | 100                  | 2                |
| ABL1-nonphosphorylated        | ABL1         | 92                   | 1.963787827      |
| ABL1-phosphorylated           | ABL1         | 84                   | 1.924279286      |
| ABL2                          | ABL2         | 100                  | 2                |
| ACVR1                         | ACVR1        | 100                  | 2                |
| ACVR1B                        | ACVR1B       | 100                  | 2                |
| ACVR2A                        | ACVR2A       | 98                   | 1.991226076      |
| ACVR2B                        | ACVR2B       | 92                   | 1.963787827      |
| ACVRL1                        | ACVRL1       | 100                  | 2                |
| ADCK3                         | CABC1        | 100                  | 2                |
| ADCK4                         | ADCK4        | 99                   | 1.995635195      |
| AKT1                          | AKT1         | 92                   | 1.963787827      |
| AKT2                          | AKT2         | 100                  | 2                |
| AKT3                          | AKT3         | 90                   | 1.954242509      |
| ALK                           | ALK          | 100                  | 2                |
| ALK(C1156Y)                   | ALK          | 100                  | 2                |
| ALK(L1196M)                   | ALK          | 100                  | 2                |
| AMPK-alpha1                   | PRKAA1       | 95                   | 1.977723605      |
| AMPK-alpha2                   | PRKAA2       | 99                   | 1.995635195      |
| ANKK1                         | ANKK1        | 86                   | 1.934498451      |
| ARK5                          | NUAK1        | 99                   | 1.995635195      |
| ASK1                          | MAP3K5       | 100                  | 2                |
| ASK2                          | MAP3K6       | 100                  | 2                |
| AURKA                         | AURKA        | 100                  | 2                |

*Delineation of IRAK and TAK1 inflammatory processes*

|               |        |     |             |
|---------------|--------|-----|-------------|
| AURKB         | AURKB  | 100 | 2           |
| AURKC         | AURKC  | 81  | 1.908485019 |
| AXL           | AXL    | 80  | 1.903089987 |
| BIKE          | BMP2K  | 73  | 1.86332286  |
| BLK           | BLK    | 43  | 1.633468456 |
| BMPR1A        | BMPR1A | 100 | 2           |
| BMPR1B        | BMPR1B | 100 | 2           |
| BMPR2         | BMPR2  | 100 | 2           |
| BMX           | BMX    | 100 | 2           |
| BRAF          | BRAF   | 100 | 2           |
| BRAF(V600E)   | BRAF   | 90  | 1.954242509 |
| BRK           | PTK6   | 100 | 2           |
| BRSK1         | BRSK1  | 89  | 1.949390007 |
| BRSK2         | BRSK2  | 94  | 1.973127854 |
| BTK           | BTK    | 100 | 2           |
| BUB1          | BUB1   | 100 | 2           |
| CAMK1         | CAMK1  | 100 | 2           |
| CAMK1B        | PNCK   | 100 | 2           |
| CAMK1D        | CAMK1D | 100 | 2           |
| CAMK1G        | CAMK1G | 100 | 2           |
| CAMK2A        | CAMK2A | 100 | 2           |
| CAMK2B        | CAMK2B | 100 | 2           |
| CAMK2D        | CAMK2D | 100 | 2           |
| CAMK2G        | CAMK2G | 99  | 1.995635195 |
| CAMK4         | CAMK4  | 99  | 1.995635195 |
| CAMKK1        | CAMKK1 | 77  | 1.886490725 |
| CAMKK2        | CAMKK2 | 72  | 1.857332496 |
| CASK          | CASK   | 100 | 2           |
| CDC2L1        | CDK11B | 89  | 1.949390007 |
| CDC2L2        | CDC2L2 | 100 | 2           |
| CDC2L5        | CDK13  | 100 | 2           |
| CDK11         | CDK19  | 94  | 1.973127854 |
| CDK2          | CDK2   | 98  | 1.991226076 |
| CDK3          | CDK3   | 88  | 1.944482672 |
| CDK4          | CDK4   | 100 | 2           |
| CDK4-cyclinD1 | CDK4   | 86  | 1.934498451 |
| CDK4-cyclinD3 | CDK4   | 98  | 1.991226076 |
| CDK5          | CDK5   | 100 | 2           |
| CDK7          | CDK7   | 87  | 1.939519253 |
| CDK8          | CDK8   | 97  | 1.986771734 |
| CDK9          | CDK9   | 83  | 1.919078092 |

*Delineation of IRAK and TAK1 inflammatory processes*

|                     |          |     |             |
|---------------------|----------|-----|-------------|
| CDKL1               | CDKL1    | 83  | 1.919078092 |
| CDKL2               | CDKL2    | 88  | 1.944482672 |
| CDKL3               | CDKL3    | 95  | 1.977723605 |
| CDKL5               | CDKL5    | 100 | 2           |
| CHEK1               | CHEK1    | 94  | 1.973127854 |
| CHEK2               | CHEK2    | 100 | 2           |
| CIT                 | CIT      | 72  | 1.857332496 |
| CLK1                | CLK1     | 29  | 1.462397998 |
| CLK2                | CLK2     | 88  | 1.944482672 |
| CLK3                | CLK3     | 83  | 1.919078092 |
| CLK4                | CLK4     | 28  | 1.447158031 |
| CSF1R               | CSF1R    | 86  | 1.934498451 |
| CSF1R-autoinhibited | CSF1R    | 53  | 1.72427587  |
| CSK                 | CSK      | 100 | 2           |
| CSNK1A1             | CSNK1A1  | 60  | 1.77815125  |
| CSNK1A1L            | CSNK1A1L | 78  | 1.892094603 |
| CSNK1D              | CSNK1D   | 43  | 1.633468456 |
| CSNK1E              | CSNK1E   | 44  | 1.643452676 |
| CSNK1G1             | CSNK1G1  | 63  | 1.799340549 |
| CSNK1G2             | CSNK1G2  | 49  | 1.69019608  |
| CSNK1G3             | CSNK1G3  | 75  | 1.875061263 |
| CSNK2A1             | CSNK2A1  | 100 | 2           |
| CSNK2A2             | CSNK2A2  | 91  | 1.959041392 |
| CTK                 | MATK     | 100 | 2           |
| DAPK1               | DAPK1    | 91  | 1.959041392 |
| DAPK2               | DAPK2    | 97  | 1.986771734 |
| DAPK3               | DAPK3    | 100 | 2           |
| DCAMKL1             | DCLK1    | 91  | 1.959041392 |
| DCAMKL2             | DCLK2    | 100 | 2           |
| DCAMKL3             | DCLK3    | 100 | 2           |
| DDR1                | DDR1     | 92  | 1.963787827 |
| DDR2                | DDR2     | 100 | 2           |
| DLK                 | MAP3K12  | 100 | 2           |
| DMPK                | DMPK     | 94  | 1.973127854 |
| DMPK2               | CDC42BPG | 100 | 2           |
| DRAK1               | STK17A   | 88  | 1.944482672 |
| DRAK2               | STK17B   | 88  | 1.944482672 |
| DYRK1A              | DYRK1A   | 90  | 1.954242509 |
| DYRK1B              | DYRK1B   | 25  | 1.397940009 |
| DYRK2               | DYRK2    | 100 | 2           |
| EGFR                | EGFR     | 90  | 1.954242509 |

*Delineation of IRAK and TAK1 inflammatory processes*

|                           |         |     |             |
|---------------------------|---------|-----|-------------|
| EGFR(E746-A750del)        | EGFR    | 98  | 1.991226076 |
| EGFR(G719C)               | EGFR    | 89  | 1.949390007 |
| EGFR(G719S)               | EGFR    | 90  | 1.954242509 |
| EGFR(L747-E749del, A750P) | EGFR    | 99  | 1.995635195 |
| EGFR(L747-S752del, P753S) | EGFR    | 100 | 2           |
| EGFR(L747-T751del,Sins)   | EGFR    | 96  | 1.982271233 |
| EGFR(L858R)               | EGFR    | 81  | 1.908485019 |
| EGFR(L858R,T790M)         | EGFR    | 100 | 2           |
| EGFR(L861Q)               | EGFR    | 80  | 1.903089987 |
| EGFR(S752-I759del)        | EGFR    | 96  | 1.982271233 |
| EGFR(T790M)               | EGFR    | 92  | 1.963787827 |
| EIF2AK1                   | EIF2AK1 | 93  | 1.968482949 |
| EPHA1                     | EPHA1   | 100 | 2           |
| EPHA2                     | EPHA2   | 100 | 2           |
| EPHA3                     | EPHA3   | 93  | 1.968482949 |
| EPHA4                     | EPHA4   | 100 | 2           |
| EPHA5                     | EPHA5   | 100 | 2           |
| EPHA6                     | EPHA6   | 100 | 2           |
| EPHA7                     | EPHA7   | 100 | 2           |
| EPHA8                     | EPHA8   | 100 | 2           |
| EPHB1                     | EPHB1   | 100 | 2           |
| EPHB2                     | EPHB2   | 83  | 1.919078092 |
| EPHB3                     | EPHB3   | 100 | 2           |
| EPHB4                     | EPHB4   | 100 | 2           |
| EPHB6                     | EPHB6   | 93  | 1.968482949 |
| ERBB2                     | ERBB2   | 100 | 2           |
| ERBB3                     | ERBB3   | 100 | 2           |
| ERBB4                     | ERBB4   | 79  | 1.897627091 |
| ERK1                      | MAPK3   | 100 | 2           |
| ERK2                      | MAPK1   | 100 | 2           |
| ERK3                      | MAPK6   | 100 | 2           |
| ERK4                      | MAPK4   | 93  | 1.968482949 |
| ERK5                      | MAPK7   | 100 | 2           |
| ERK8                      | MAPK15  | 82  | 1.913813852 |
| ERN1                      | ERN1    | 92  | 1.963787827 |
| FAK                       | PTK2    | 100 | 2           |
| FER                       | FER     | 95  | 1.977723605 |
| FES                       | FES     | 99  | 1.995635195 |
| FGFR1                     | FGFR1   | 94  | 1.973127854 |
| FGFR2                     | FGFR2   | 100 | 2           |
| FGFR3                     | FGFR3   | 100 | 2           |

*Delineation of IRAK and TAK1 inflammatory processes*

|                       |         |     |             |
|-----------------------|---------|-----|-------------|
| FGFR3(G697C)          | FGFR3   | 98  | 1.991226076 |
| FGFR4                 | FGFR4   | 93  | 1.968482949 |
| FGR                   | FGR     | 95  | 1.977723605 |
| FLT1                  | FLT1    | 73  | 1.86332286  |
| FLT3                  | FLT3    | 40  | 1.602059991 |
| FLT3(D835H)           | FLT3    | 48  | 1.681241237 |
| FLT3(D835V)           | FLT3    | 93  | 1.968482949 |
| FLT3(D835Y)           | FLT3    | 26  | 1.414973348 |
| FLT3(ITD)             | FLT3    | 24  | 1.380211242 |
| FLT3(ITD,D835V)       | FLT3    | 43  | 1.633468456 |
| FLT3(ITD,F691L)       | FLT3    | 85  | 1.929418926 |
| FLT3(K663Q)           | FLT3    | 35  | 1.544068044 |
| FLT3(N841I)           | FLT3    | 77  | 1.886490725 |
| FLT3(R834Q)           | FLT3    | 100 | 2           |
| FLT3-autoinhibited    | FLT3    | 68  | 1.832508913 |
| FLT4                  | FLT4    | 96  | 1.982271233 |
| FRK                   | FRK     | 100 | 2           |
| FYN                   | FYN     | 100 | 2           |
| GAK                   | GAK     | 82  | 1.913813852 |
| GCN2(Kin.Dom.2,S808G) | EIF2AK4 | 100 | 2           |
| GRK1                  | GRK1    | 100 | 2           |
| GRK2                  | ADRBK1  | 78  | 1.892094603 |
| GRK3                  | ADRBK2  | 100 | 2           |
| GRK4                  | GRK4    | 71  | 1.851258349 |
| GRK7                  | GRK7    | 100 | 2           |
| GSK3A                 | GSK3A   | 95  | 1.977723605 |
| GSK3B                 | GSK3B   | 100 | 2           |
| HASPIN                | GSG2    | 100 | 2           |
| HCK                   | HCK     | 87  | 1.939519253 |
| HIPK1                 | HIPK1   | 78  | 1.892094603 |
| HIPK2                 | HIPK2   | 100 | 2           |
| HIPK3                 | HIPK3   | 100 | 2           |
| HIPK4                 | HIPK4   | 95  | 1.977723605 |
| HPK1                  | MAP4K1  | 94  | 1.973127854 |
| HUNK                  | HUNK    | 100 | 2           |
| ICK                   | ICK     | 100 | 2           |
| IGF1R                 | IGF1R   | 100 | 2           |
| IKK-alpha             | CHUK    | 100 | 2           |
| IKK-beta              | IKKBK   | 100 | 2           |
| IKK-epsilon           | IKBKE   | 100 | 2           |
| INSR                  | INSR    | 90  | 1.954242509 |

*Delineation of IRAK and TAK1 inflammatory processes*

|                              |         |      |              |
|------------------------------|---------|------|--------------|
| INSRR                        | INSRR   | 94   | 1.973127854  |
| IRAK1                        | IRAK1   | 0.65 | -0.187086643 |
| IRAK3                        | IRAK3   | 78   | 1.892094603  |
| IRAK4                        | IRAK4   | 1.6  | 0.204119983  |
| ITK                          | ITK     | 75   | 1.875061263  |
| JAK1(JH1domain-catalytic)    | JAK1    | 100  | 2            |
| JAK1(JH2domain-pseudokinase) | JAK1    | 93   | 1.968482949  |
| JAK2(JH1domain-catalytic)    | JAK2    | 100  | 2            |
| JAK3(JH1domain-catalytic)    | JAK3    | 100  | 2            |
| JNK1                         | MAPK8   | 100  | 2            |
| JNK2                         | MAPK9   | 100  | 2            |
| JNK3                         | MAPK10  | 100  | 2            |
| KIT                          | KIT     | 38   | 1.579783597  |
| KIT(A829P)                   | KIT     | 100  | 2            |
| KIT(D816H)                   | KIT     | 100  | 2            |
| KIT(D816V)                   | KIT     | 100  | 2            |
| KIT(L576P)                   | KIT     | 28   | 1.447158031  |
| KIT(V559D)                   | KIT     | 23   | 1.361727836  |
| KIT(V559D,T670I)             | KIT     | 50   | 1.698970004  |
| KIT(V559D,V654A)             | KIT     | 37   | 1.568201724  |
| KIT-autoinhibited            | KIT     | 57   | 1.755874856  |
| LATS1                        | LATS1   | 100  | 2            |
| LATS2                        | LATS2   | 100  | 2            |
| LCK                          | LCK     | 100  | 2            |
| LIMK1                        | LIMK1   | 100  | 2            |
| LIMK2                        | LIMK2   | 96   | 1.982271233  |
| LKB1                         | STK11   | 100  | 2            |
| LOK                          | STK10   | 87   | 1.939519253  |
| LRRK2                        | LRRK2   | 100  | 2            |
| LRRK2(G2019S)                | LRRK2   | 100  | 2            |
| LTK                          | LTK     | 79   | 1.897627091  |
| LYN                          | LYN     | 93   | 1.968482949  |
| LZK                          | MAP3K13 | 100  | 2            |
| MAK                          | MAK     | 100  | 2            |
| MAP3K1                       | MAP3K1  | 100  | 2            |
| MAP3K15                      | MAP3K15 | 100  | 2            |
| MAP3K2                       | MAP3K2  | 100  | 2            |
| MAP3K3                       | MAP3K3  | 94   | 1.973127854  |
| MAP3K4                       | MAP3K4  | 100  | 2            |
| MAP4K2                       | MAP4K2  | 100  | 2            |
| MAP4K3                       | MAP4K3  | 98   | 1.991226076  |

*Delineation of IRAK and TAK1 inflammatory processes*

|             |          |     |             |
|-------------|----------|-----|-------------|
| MAP4K4      | MAP4K4   | 83  | 1.919078092 |
| MAP4K5      | MAP4K5   | 97  | 1.986771734 |
| MAPKAPK2    | MAPKAPK2 | 95  | 1.977723605 |
| MAPKAPK5    | MAPKAPK5 | 100 | 2           |
| MARK1       | MARK1    | 89  | 1.949390007 |
| MARK2       | MARK2    | 100 | 2           |
| MARK3       | MARK3    | 91  | 1.959041392 |
| MARK4       | MARK4    | 85  | 1.929418926 |
| MAST1       | MAST1    | 96  | 1.982271233 |
| MEK1        | MAP2K1   | 100 | 2           |
| MEK2        | MAP2K2   | 96  | 1.982271233 |
| MEK3        | MAP2K3   | 100 | 2           |
| MEK4        | MAP2K4   | 100 | 2           |
| MEK5        | MAP2K5   | 87  | 1.939519253 |
| MEK6        | MAP2K6   | 100 | 2           |
| MELK        | MELK     | 100 | 2           |
| MERTK       | MERTK    | 86  | 1.934498451 |
| MET         | MET      | 100 | 2           |
| MET(M1250T) | MET      | 97  | 1.986771734 |
| MET(Y1235D) | MET      | 95  | 1.977723605 |
| MINK        | MINK1    | 58  | 1.763427994 |
| MKK7        | MAP2K7   | 100 | 2           |
| MKNK1       | MKNK1    | 100 | 2           |
| MKNK2       | MKNK2    | 100 | 2           |
| MLCK        | MYLK3    | 89  | 1.949390007 |
| MLK1        | MAP3K9   | 97  | 1.986771734 |
| MLK2        | MAP3K10  | 78  | 1.892094603 |
| MLK3        | MAP3K11  | 96  | 1.982271233 |
| MRCKA       | CDC42BPA | 86  | 1.934498451 |
| MRCKB       | CDC42BPB | 100 | 2           |
| MST1        | STK4     | 80  | 1.903089987 |
| MST1R       | MST1R    | 100 | 2           |
| MST2        | STK3     | 82  | 1.913813852 |
| MST3        | STK24    | 100 | 2           |
| MST4        | MST4     | 100 | 2           |
| MTOR        | MTOR     | 100 | 2           |
| MUSK        | MUSK     | 100 | 2           |
| MYLK        | MYLK     | 97  | 1.986771734 |
| MYLK2       | MYLK2    | 94  | 1.973127854 |
| MYLK4       | MYLK4    | 100 | 2           |
| MYO3A       | MYO3A    | 95  | 1.977723605 |



*Delineation of IRAK and TAK1 inflammatory processes*

|                       |             |     |             |
|-----------------------|-------------|-----|-------------|
| MYO3B                 | MYO3B       | 93  | 1.968482949 |
| NDR1                  | STK38       | 94  | 1.973127854 |
| NDR2                  | STK38L      | 88  | 1.944482672 |
| NEK1                  | NEK1        | 100 | 2           |
| NEK10                 | NEK10       | 100 | 2           |
| NEK11                 | NEK11       | 100 | 2           |
| NEK2                  | NEK2        | 88  | 1.944482672 |
| NEK3                  | NEK3        | 98  | 1.991226076 |
| NEK4                  | NEK4        | 100 | 2           |
| NEK5                  | NEK5        | 100 | 2           |
| NEK6                  | NEK6        | 100 | 2           |
| NEK7                  | NEK7        | 91  | 1.959041392 |
| NEK9                  | NEK9        | 86  | 1.934498451 |
| NIK                   | MAP3K14     | 97  | 1.986771734 |
| NIM1                  | MGC42105    | 100 | 2           |
| NLK                   | NLK         | 100 | 2           |
| OSR1                  | OXR1        | 100 | 2           |
| p38-alpha             | MAPK14      | 100 | 2           |
| p38-beta              | MAPK11      | 100 | 2           |
| p38-delta             | MAPK13      | 99  | 1.995635195 |
| p38-gamma             | MAPK12      | 98  | 1.991226076 |
| PAK1                  | PAK1        | 100 | 2           |
| PAK2                  | PAK2        | 100 | 2           |
| PAK3                  | PAK3        | 73  | 1.86332286  |
| PAK4                  | PAK4        | 100 | 2           |
| PAK6                  | PAK6        | 100 | 2           |
| PAK7                  | PAK7        | 84  | 1.924279286 |
| PCTK1                 | CDK16       | 100 | 2           |
| PCTK2                 | CDK17       | 97  | 1.986771734 |
| PCTK3                 | CDK18       | 99  | 1.995635195 |
| PDGFRA                | PDGFRA      | 97  | 1.986771734 |
| PDGFRB                | PDGFRB      | 74  | 1.86923172  |
| PDPK1                 | PDPK1       | 95  | 1.977723605 |
| PFCDPK1(P.falciparum) | CDPK1       | 100 | 2           |
| PFPK5(P.falciparum)   | MAL13P1.279 | 100 | 2           |
| PFTAIRE2              | CDK15       | 94  | 1.973127854 |
| PFTK1                 | CDK14       | 100 | 2           |
| PHKG1                 | PHKG1       | 97  | 1.986771734 |
| PHKG2                 | PHKG2       | 86  | 1.934498451 |
| PIK3C2B               | PIK3C2B     | 97  | 1.986771734 |
| PIK3C2G               | PIK3C2G     | 99  | 1.995635195 |

*Delineation of IRAK and TAK1 inflammatory processes*

|                      |         |     |             |
|----------------------|---------|-----|-------------|
| PIK3CA               | PIK3CA  | 100 | 2           |
| PIK3CA(C420R)        | PIK3CA  | 100 | 2           |
| PIK3CA(E542K)        | PIK3CA  | 81  | 1.908485019 |
| PIK3CA(E545A)        | PIK3CA  | 99  | 1.995635195 |
| PIK3CA(E545K)        | PIK3CA  | 100 | 2           |
| PIK3CA(H1047L)       | PIK3CA  | 100 | 2           |
| PIK3CA(H1047Y)       | PIK3CA  | 100 | 2           |
| PIK3CA(I800L)        | PIK3CA  | 100 | 2           |
| PIK3CA(M1043I)       | PIK3CA  | 100 | 2           |
| PIK3CA(Q546K)        | PIK3CA  | 52  | 1.716003344 |
| PIK3CB               | PIK3CB  | 100 | 2           |
| PIK3CD               | PIK3CD  | 81  | 1.908485019 |
| PIK3CG               | PIK3CG  | 100 | 2           |
| PIK4CB               | PI4KB   | 100 | 2           |
| PIKFYVE              | PIKFYVE | 100 | 2           |
| PIM1                 | PIM1    | 100 | 2           |
| PIM2                 | PIM2    | 100 | 2           |
| PIM3                 | PIM3    | 100 | 2           |
| PIP5K1A              | PIP5K1A | 73  | 1.86332286  |
| PIP5K1C              | PIP5K1C | 100 | 2           |
| PIP5K2B              | PIP4K2B | 68  | 1.832508913 |
| PIP5K2C              | PIP4K2C | 42  | 1.62324929  |
| PKAC-alpha           | PRKACA  | 100 | 2           |
| PKAC-beta            | PRKACB  | 87  | 1.939519253 |
| PKMYT1               | PKMYT1  | 100 | 2           |
| PKN1                 | PKN1    | 97  | 1.986771734 |
| PKN2                 | PKN2    | 95  | 1.977723605 |
| PKNB(M.tuberculosis) | pknB    | 94  | 1.973127854 |
| PLK1                 | PLK1    | 100 | 2           |
| PLK2                 | PLK2    | 100 | 2           |
| PLK3                 | PLK3    | 100 | 2           |
| PLK4                 | PLK4    | 94  | 1.973127854 |
| PRKCD                | PRKCD   | 88  | 1.944482672 |
| PRKCE                | PRKCE   | 100 | 2           |
| PRKCH                | PRKCH   | 96  | 1.982271233 |
| PRKCI                | PRKCI   | 100 | 2           |
| PRKCQ                | PRKCQ   | 90  | 1.954242509 |
| PRKD1                | PRKD1   | 92  | 1.963787827 |
| PRKD2                | PRKD2   | 100 | 2           |
| PRKD3                | PRKD3   | 93  | 1.968482949 |
| PRKG1                | PRKG1   | 90  | 1.954242509 |

*Delineation of IRAK and TAK1 inflammatory processes*

|                               |          |     |             |
|-------------------------------|----------|-----|-------------|
| PRKG2                         | PRKG2    | 94  | 1.973127854 |
| PRKR                          | EIF2AK2  | 100 | 2           |
| PRKX                          | PRKX     | 96  | 1.982271233 |
| PRP4                          | PRPF4B   | 100 | 2           |
| PYK2                          | PTK2B    | 89  | 1.949390007 |
| QSK                           | KIAA0999 | 100 | 2           |
| RAF1                          | RAF1     | 100 | 2           |
| RET                           | RET      | 96  | 1.982271233 |
| RET(M918T)                    | RET      | 91  | 1.959041392 |
| RET(V804L)                    | RET      | 85  | 1.929418926 |
| RET(V804M)                    | RET      | 82  | 1.913813852 |
| RIOK1                         | RIOK1    | 56  | 1.748188027 |
| RIOK2                         | RIOK2    | 100 | 2           |
| RIOK3                         | RIOK3    | 80  | 1.903089987 |
| RIPK1                         | RIPK1    | 93  | 1.968482949 |
| RIPK2                         | RIPK2    | 100 | 2           |
| RIPK4                         | RIPK4    | 94  | 1.973127854 |
| RIPK5                         | DSTYK    | 100 | 2           |
| ROCK1                         | ROCK1    | 100 | 2           |
| ROCK2                         | ROCK2    | 100 | 2           |
| ROS1                          | ROS1     | 99  | 1.995635195 |
| RPS6KA4(Kin.Dom.1-N-terminal) | RPS6KA4  | 89  | 1.949390007 |
| RPS6KA4(Kin.Dom.2-C-terminal) | RPS6KA4  | 100 | 2           |
| RPS6KA5(Kin.Dom.1-N-terminal) | RPS6KA5  | 97  | 1.986771734 |
| RPS6KA5(Kin.Dom.2-C-terminal) | RPS6KA5  | 90  | 1.954242509 |
| RSK1(Kin.Dom.1-N-terminal)    | RPS6KA1  | 89  | 1.949390007 |
| RSK1(Kin.Dom.2-C-terminal)    | RPS6KA1  | 100 | 2           |
| RSK2(Kin.Dom.1-N-terminal)    | RPS6KA3  | 100 | 2           |
| RSK2(Kin.Dom.2-C-terminal)    | RPS6KA3  | 100 | 2           |
| RSK3(Kin.Dom.1-N-terminal)    | RPS6KA2  | 92  | 1.963787827 |
| RSK3(Kin.Dom.2-C-terminal)    | RPS6KA2  | 100 | 2           |
| RSK4(Kin.Dom.1-N-terminal)    | RPS6KA6  | 100 | 2           |
| RSK4(Kin.Dom.2-C-terminal)    | RPS6KA6  | 100 | 2           |
| S6K1                          | RPS6KB1  | 100 | 2           |
| SBK1                          | SBK1     | 100 | 2           |
| SGK                           | SGK1     | 100 | 2           |
| SgK110                        | SgK110   | 100 | 2           |
| SGK2                          | SGK2     | 100 | 2           |
| SGK3                          | SGK3     | 100 | 2           |
| SIK                           | SIK1     | 100 | 2           |
| SIK2                          | SIK2     | 100 | 2           |

*Delineation of IRAK and TAK1 inflammatory processes*

|                              |        |     |             |
|------------------------------|--------|-----|-------------|
| SLK                          | SLK    | 100 | 2           |
| SNARK                        | NUAK2  | 94  | 1.973127854 |
| SNRK                         | SNRK   | 100 | 2           |
| SRC                          | SRC    | 100 | 2           |
| SRMS                         | SRMS   | 100 | 2           |
| SRPK1                        | SRPK1  | 93  | 1.968482949 |
| SRPK2                        | SRPK2  | 100 | 2           |
| SRPK3                        | SRPK3  | 79  | 1.897627091 |
| STK16                        | STK16  | 43  | 1.633468456 |
| STK33                        | STK33  | 96  | 1.982271233 |
| STK35                        | STK35  | 100 | 2           |
| STK36                        | STK36  | 87  | 1.939519253 |
| STK39                        | STK39  | 100 | 2           |
| SYK                          | SYK    | 97  | 1.986771734 |
| TAK1                         | MAP3K7 | 73  | 1.86332286  |
| TAOK1                        | TAOK1  | 100 | 2           |
| TAOK2                        | TAOK2  | 100 | 2           |
| TAOK3                        | TAOK3  | 58  | 1.763427994 |
| TBK1                         | TBK1   | 85  | 1.929418926 |
| TEC                          | TEC    | 100 | 2           |
| TESK1                        | TESK1  | 100 | 2           |
| TGFBR1                       | TGFBR1 | 95  | 1.977723605 |
| TGFBR2                       | TGFBR2 | 100 | 2           |
| TIE1                         | TIE1   | 100 | 2           |
| TIE2                         | TEK    | 91  | 1.959041392 |
| TLK1                         | TLK1   | 94  | 1.973127854 |
| TLK2                         | TLK2   | 100 | 2           |
| TNIK                         | TNIK   | 62  | 1.792391689 |
| TNK1                         | TNK1   | 100 | 2           |
| TNK2                         | TNK2   | 100 | 2           |
| TNNI3K                       | TNNI3K | 100 | 2           |
| TRKA                         | NTRK1  | 80  | 1.903089987 |
| TRKB                         | NTRK2  | 87  | 1.939519253 |
| TRKC                         | NTRK3  | 100 | 2           |
| TRPM6                        | TRPM6  | 100 | 2           |
| TSSK1B                       | TSSK1B | 100 | 2           |
| TSSK3                        | TSSK3  | 100 | 2           |
| TTK                          | TTK    | 100 | 2           |
| TXK                          | TXK    | 100 | 2           |
| TYK2(JH1domain-catalytic)    | TYK2   | 100 | 2           |
| TYK2(JH2domain-pseudokinase) | TYK2   | 100 | 2           |

*Delineation of IRAK and TAK1 inflammatory processes*

|        |         |     |             |
|--------|---------|-----|-------------|
| TYRO3  | TYRO3   | 93  | 1.968482949 |
| ULK1   | ULK1    | 100 | 2           |
| ULK2   | ULK2    | 100 | 2           |
| ULK3   | ULK3    | 100 | 2           |
| VEGFR2 | KDR     | 85  | 1.929418926 |
| VPS34  | PIK3C3  | 100 | 2           |
| VRK2   | VRK2    | 100 | 2           |
| WEE1   | WEE1    | 98  | 1.991226076 |
| WEE2   | WEE2    | 93  | 1.968482949 |
| WNK1   | WNK1    | 100 | 2           |
| WNK2   | WNK2    | 99  | 1.995635195 |
| WNK3   | WNK3    | 100 | 2           |
| WNK4   | WNK4    | 100 | 2           |
| YANK1  | STK32A  | 100 | 2           |
| YANK2  | STK32B  | 100 | 2           |
| YANK3  | STK32C  | 98  | 1.991226076 |
| YES    | YES1    | 100 | 2           |
| YSK1   | STK25   | 100 | 2           |
| YSK4   | MAP3K19 | 89  | 1.949390007 |
| ZAK    | ZAK     | 100 | 2           |
| ZAP70  | ZAP70   | 100 | 2           |

Table 1s - 468 kinase profile of HS-243 (10  $\mu$ M) inhibition.

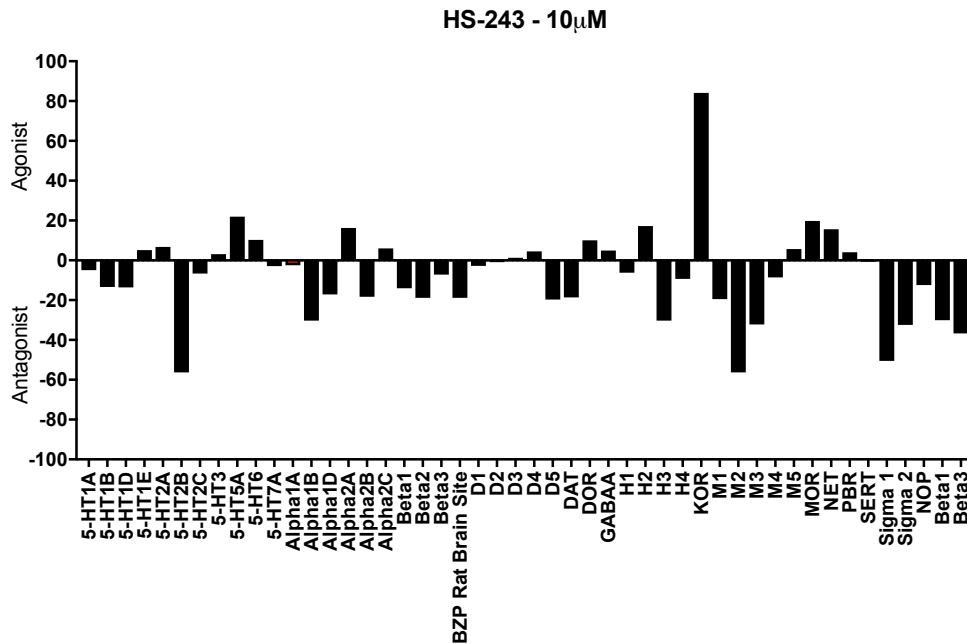

**Figure 3s.**

Selectivity of HS-243 within the purinome. HS-243 was tested at 10 $\mu$ M against various ATP binding enzymes for potency. Positive values indicate agonist like potential, whereas negative values indicated antagonist activity. Compounds with greater than 50% agonist or antagonist activity were further tested in a dose dependent manner for  $K_i$  determination. KOR and 5-HT2A were determined to have a  $K_i > 10\mu$ M.

*Delineation of IRAK and TAK1 inflammatory processes*

| <b>Analyte</b>      | <b>Mean- Vehicle</b> | <b>SEM -Vehicle</b> | <b>Mean - HS-243</b> | <b>SEM HS-243</b> |
|---------------------|----------------------|---------------------|----------------------|-------------------|
| Adiponectin         | 13.22775             | 0.294100925         | 12.3845              | 0.07081196        |
| Apolipoprotein A-1  | 13.456               | 0.490706931         | 12.952               | 0.28823789        |
| Angiogenin          | 12.906625            | 0.411065302         | 12.63533333          | 0.2094567         |
| Angiopoietin-1      | 12.378625            | 0.387344882         | 12.15033333          | 0.21631311        |
| Angiopoietin-2      | 12.747125            | 0.287566469         | 12.35316667          | 0.20520972        |
| BAFF                | 11.453625            | 0.303157713         | 12.91166667          | 0.06289829        |
| BDNF                | 11.791375            | 0.215968205         | 13.156               | 0.22924387        |
| C5a                 | 11.83                | 0.15124084          | 13.42116667          | 0.17822091        |
| CD14                | 48.410375            | 3.889079167         | 22.26366667          | 0.53464672        |
| CD30                | 12.5345              | 0.53344146          | 17.20733333          | 2.41499141        |
| CD40 Ligand         | 12.811               | 0.174579137         | 10.83833333          | 2.35169925        |
| Chitinase-3 like 1  | 159.176              | 8.905261748         | 83.737               | 33.5927755        |
| Compliment Factor D | 47.173               | 4.62320498          | 19.50283333          | 3.50623291        |
| C Reactive Protein  | 12.506875            | 0.623595167         | 12.1965              | 0.11445669        |
| Cripto-1            | 11.648375            | 0.136303334         | 12.68933333          | 0.07845292        |
| Cystatin C          | 13.97625             | 0.478888187         | 13.58733333          | 0.08662868        |
| Dkk-1               | 11.8115              | 0.087466422         | 13.476               | 0.29549746        |
| DPPIV               | 11.2285              | 0.239322568         | 13.71283333          | 0.24818346        |
| EGF                 | 11.457375            | 0.443380545         | 14.01                | 0.24513619        |
| Emmprin             | 16.20825             | 1.413423039         | 14.93983333          | 0.56492804        |
| ENA-78              | 12.53175             | 0.218484696         | 14.4315              | 0.68737441        |
| Endoglin            | 14.347125            | 1.014321086         | 13.99916667          | 0.9575984         |
| Fas Ligand          | 12.104125            | 0.398350316         | 13.20816667          | 0.70662398        |
| FGF Basic           | 12.243               | 0.444221698         | 12.716               | 0.04902635        |
| FGF-7               | 12.14825             | 0.525512944         | 12.87516667          | 0.1549092         |
| FGF-19              | 17.833375            | 0.701041379         | 13.755               | 0.7780354         |
| Flt-3 Ligand        | 11.44825             | 0.211259862         | 13.59283333          | 0.30533893        |
| G-CSF               | 11.359               | 0.311966411         | 14.00266667          | 0.25511767        |
| GDF-15              | 118.37425            | 9.747109526         | 66.001               | 3.09631648        |
| GM-CSF              | 11.327875            | 0.231288904         | 14.167               | 0.10284616        |
| GRO-a               | 40.35775             | 2.992682224         | 18.75033333          | 1.04978924        |
| Growth Hormone      | 12.728875            | 0.271807405         | 12.31266667          | 0.35549383        |
| HGF                 | 12.176               | 0.361705854         | 12.531               | 0.07264698        |
| ICAM-1              | 21.35                | 1.925750103         | 16.2305              | 0.29539648        |
| IFN- $\gamma$       | 12.284375            | 0.126687341         | 12.6975              | 0.04850344        |
| IGFBP-2             | 12.046625            | 0.281491295         | 12.99233333          | 0.19891923        |
| IGFBP-3             | 12.841875            | 0.348857981         | 13.40483333          | 0.16208494        |
| IL-1a               | 12.257125            | 0.361315154         | 13.73816667          | 0.45837342        |
| IL-1B               | 12.431125            | 0.413694602         | 14.17566667          | 0.30727598        |
| IL-1ra              | 26.07325             | 7.015823391         | 16.60983333          | 0.76687821        |

*Delineation of IRAK and TAK1 inflammatory processes*

|                 |            |             |             |            |
|-----------------|------------|-------------|-------------|------------|
| IL-2            | 12.904125  | 1.005976875 | 14.20583333 | 0.1565315  |
| IL-3            | 11.195625  | 0.313998233 | 13.95916667 | 0.33563526 |
| IL-4            | 12.220875  | 0.155155349 | 12.08983333 | 0.2458052  |
| IL-5            | 12.414375  | 0.20322272  | 12.17       | 0.11326849 |
| IL_6            | 18.659375  | 4.875526751 | 14.059      | 0.81225555 |
| IL-8            | 186.629    | 6.482806918 | 140.9326667 | 5.22513274 |
| IL-10           | 12.546125  | 0.323865287 | 12.99516667 | 0.29403009 |
| IL-11           | 12.864625  | 0.409037202 | 13.12683333 | 0.12046622 |
| IL-12p70        | 11.9635    | 0.186759315 | 13.2115     | 0.10418773 |
| IL-13           | 11.983875  | 0.31101992  | 13.23783333 | 0.26994665 |
| IL-15           | 12.186     | 0.440678785 | 14.02216667 | 0.3160715  |
| IL-16           | 12.2935    | 0.151442921 | 14.192      | 0.06221535 |
| IL-17a          | 25.127     | 2.340444019 | 15.67416667 | 0.38310055 |
| IL18 Bpa        | 13.308625  | 0.468685812 | 14.37266667 | 0.23473466 |
| IL-19           | 12.177625  | 0.129918624 | 12.01133333 | 0.39865653 |
| IL-22           | 13.28125   | 0.258711591 | 12.40316667 | 0.13243153 |
| IL-23           | 12.502625  | 0.173419335 | 12.39616667 | 0.13979072 |
| IL-24           | 11.798375  | 0.410034824 | 12.98266667 | 0.35840856 |
| IL-27           | 12.195375  | 0.3447092   | 12.84716667 | 0.49056773 |
| IL-31           | 12.1105    | 0.414044533 | 13.12783333 | 0.26825941 |
| IL-32           | 11.682125  | 0.362018725 | 13.415      | 0.35678985 |
| IL-33           | 11.8375    | 0.350393648 | 13.68383333 | 0.32257226 |
| IL-34           | 13.414125  | 0.628874834 | 14.53083333 | 0.38739862 |
| IP-10           | 190.299    | 8.316666542 | 146.102     | 8.30823858 |
| I-TAC           | 208.62375  | 4.19121857  | 148.6381667 | 0.92154112 |
| Kallikrein 3    | 13.302625  | 0.160894553 | 14.96716667 | 0.57885126 |
| Leptin          | 12.4635    | 0.236778113 | 12.2375     | 0.46406366 |
| LIF             | 12.920125  | 0.237618161 | 12.28066667 | 0.28996987 |
| Lipocalin-2     | 12.7525    | 0.248897904 | 12.872      | 0.13821843 |
| MCP-1           | 84.72475   | 8.335310268 | 44.072      | 4.14330059 |
| MCP-3           | 12.924875  | 0.682612365 | 13.07766667 | 0.65138937 |
| M-CSF           | 12.241875  | 0.296985576 | 13.60283333 | 0.41760591 |
| MIF             | 31.285375  | 3.699317557 | 18.79916667 | 1.09027039 |
| MIG             | 22.10425   | 2.560970637 | 14.9165     | 0.15250109 |
| MIP-1a/MIP-1B   | 140.236875 | 11.29332363 | 78.98566667 | 6.16136068 |
| MIP-3a          | 147.45825  | 9.71111566  | 82.41166667 | 3.55793007 |
| MIP-3B          | 13.288375  | 0.85405536  | 13.83816667 | 0.20165241 |
| MMP-9           | 80.219     | 5.597329479 | 26.43466667 | 2.48240247 |
| Myeloperoxidase | 12.636625  | 0.144204192 | 12.48316667 | 0.3475848  |
| Osteopontin     | 116.299375 | 8.335600154 | 80.44533333 | 3.86825758 |
| PDGF-AA         | 55.15525   | 6.662486327 | 42.88       | 1.66955713 |



*Delineation of IRAK and TAK1 inflammatory processes*

|                  |            |             |             |            |
|------------------|------------|-------------|-------------|------------|
| PDGF-AB/BB       | 11.733875  | 0.309258682 | 12.317      | 0.67811448 |
| Pentraxin 3      | 17.318875  | 1.131816191 | 13.30816667 | 0.55383582 |
| PF4              | 12.45      | 0.225323194 | 13.04083333 | 0.36993291 |
| RAGE             | 12.187125  | 0.293961759 | 13.30883333 | 0.47052651 |
| RANTES           | 108.090875 | 11.1092317  | 57.869      | 5.7401955  |
| RBP-4            | 12.10025   | 0.074075553 | 13.79916667 | 0.36737814 |
| Relaxin-2        | 10.685375  | 0.376761108 | 13.5815     | 0.35881135 |
| Resistin         | 11.818625  | 0.535817381 | 13.881      | 0.40083205 |
| SDF-1a           | 14.72825   | 0.658666124 | 14.516      | 0.08474816 |
| Serpin E1        | 14.5955    | 0.475074073 | 13.0295     | 0.18599888 |
| SHBG             | 12.51325   | 0.300484643 | 12.19316667 | 0.42732953 |
| ST2              | 12.356     | 0.278630206 | 12.2965     | 0.26722041 |
| TARC             | 11.953375  | 0.322700866 | 12.36783333 | 0.51375305 |
| TFF-3            | 12.598625  | 0.278451774 | 12.73566667 | 0.54748557 |
| TfR              | 12.811125  | 0.345806688 | 13.12233333 | 0.38368285 |
| TGF-alpha        | 12.55725   | 0.342744712 | 13.49116667 | 0.68970147 |
| Thrombospondin-1 | 17.24675   | 1.186240183 | 14.654      | 0.30048128 |
| TNF-alpha        | 90.283125  | 9.304893908 | 98.70133333 | 2.2278062  |
| uPAR             | 65.289625  | 8.507473287 | 28.4885     | 0.58055125 |
| VEGF             | 12.047125  | 0.577673941 | 13.87583333 | 0.27171099 |
| Vitamin DBP      | 12.9335    | 0.378149827 | 12.482      | 0.43565018 |
| CD31             | 25.0875    | 3.268090466 | 20.112      | 0.3854025  |
| Tim-3            | 111.803125 | 9.545909991 | 70.137      | 3.59899119 |
| VCAM-1           | 14.625625  | 0.819188022 | 13.20483333 | 0.38688977 |

Table 2s

THP-1 cells were challenged with LPS for 24 hours in the presence of vehicle or HS-243. All 105 cytokine analytes presented as mean, and standard error of the mean (SEM).
